# Supplementary material
Source: PubMed Central journal article supplement (PMC1899998)
Supplement: molcellb_27_10_3578__1.pdf [file molcellb_27_10_3578__1.pdf]

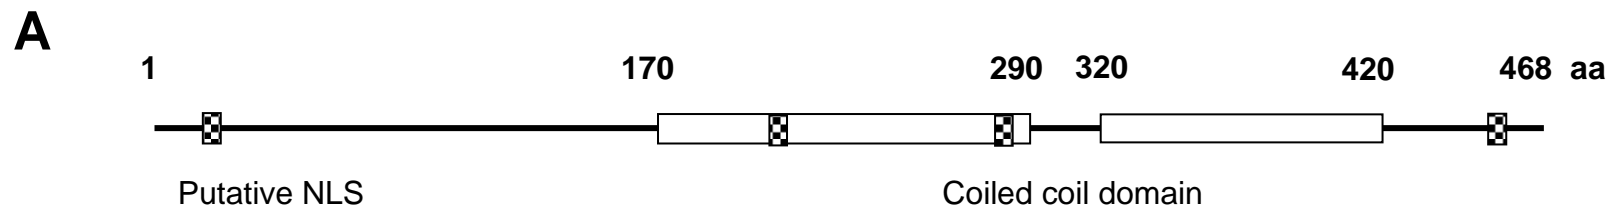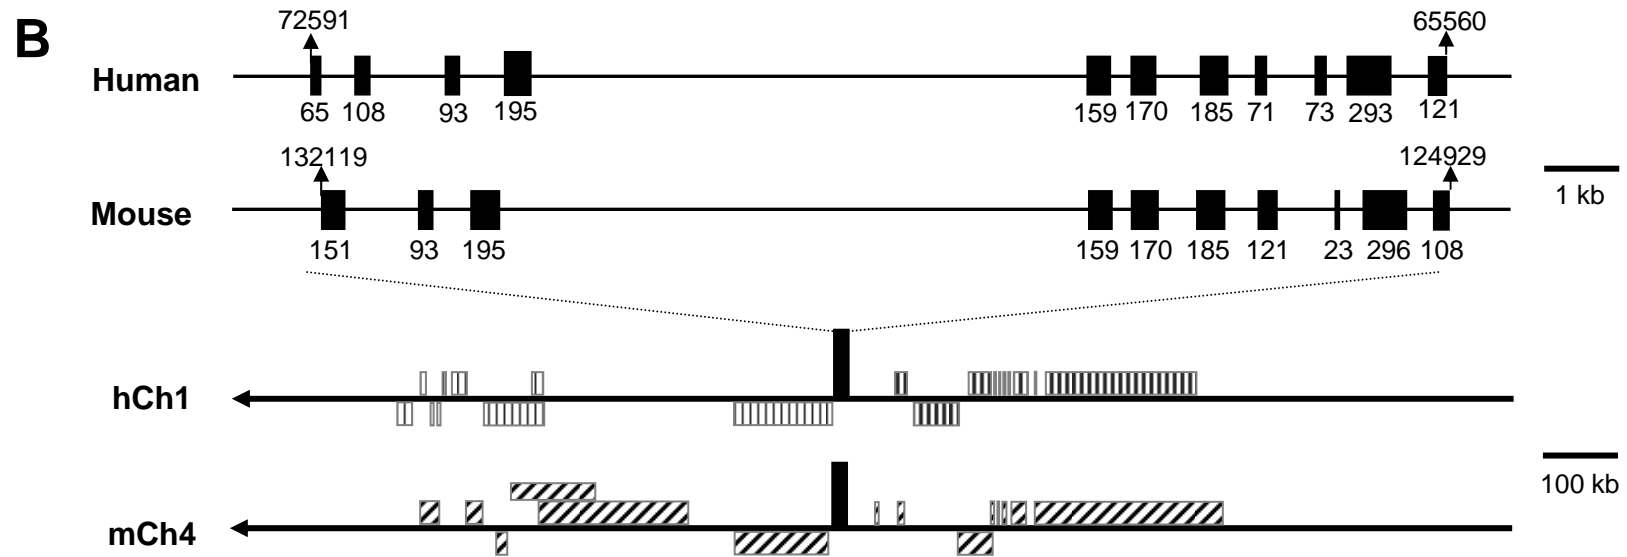

Figure S1

**A**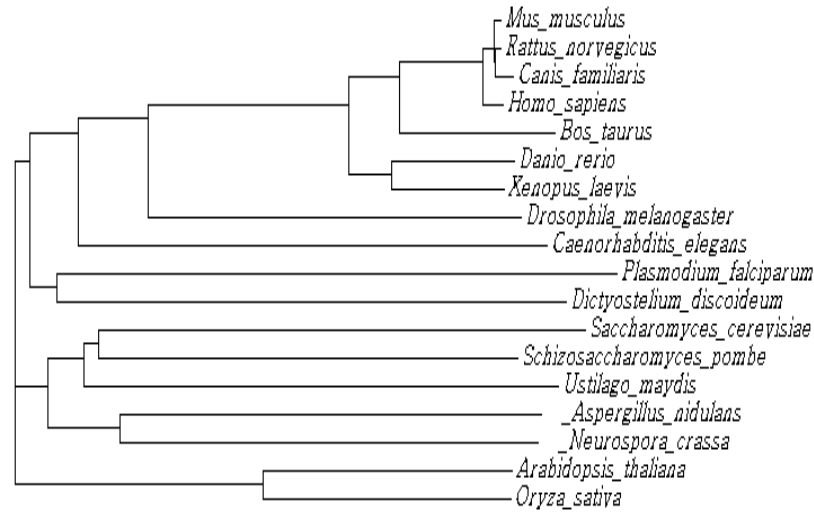**B**

|                                  | <i>Mus musculus</i> | <i>Rattus norvegicus</i> | <i>Canis familiaris</i> | <i>Homo sapiens</i> | <i>Bos taurus</i> | <i>Danio rerio</i> | <i>Xenopus laevis</i> | <i>Drosophila melanogaster</i> | <i>Caenorhabditis elegans</i> | <i>Plasmodium falciparum</i> | <i>Dictyostelium discoideum</i> | <i>Saccharomyces cerevisiae</i> | <i>Schizosaccharomyces pombe</i> | <i>Ustilago maydis</i> | <i>Aspergillus nidulans</i> | <i>Neurospora crassa</i> | <i>Arabidopsis thaliana</i> | <i>Oryza sativa</i> |
|----------------------------------|---------------------|--------------------------|-------------------------|---------------------|-------------------|--------------------|-----------------------|--------------------------------|-------------------------------|------------------------------|---------------------------------|---------------------------------|----------------------------------|------------------------|-----------------------------|--------------------------|-----------------------------|---------------------|
| <i>Mus musculus</i>              | 100                 | 98                       | 97                      | 78                  | 79                | 83                 | 47                    | 33                             | 18                            | 21                           | 17                              | 25                              | 30                               | 26                     | 26                          | 25                       | 27                          | 25                  |
| <i>Rattus norvegicus</i>         |                     | 100                      | 98                      | 78                  | 80                | 83                 | 47                    | 33                             | 18                            | 21                           | 17                              | 25                              | 30                               | 26                     | 25                          | 25                       | 25                          | 27                  |
| <i>Canis familiaris</i>          |                     |                          | 100                     | 93                  | 79                | 80                 | 83                    | 47                             | 32                            | 17                           | 20                              | 18                              | 25                               | 26                     | 23                          | 23                       | 26                          | 28                  |
| <i>Homo sapiens</i>              |                     |                          |                         | 100                 | 82                | 79                 | 83                    | 47                             | 33                            | 18                           | 20                              | 18                              | 25                               | 28                     | 25                          | 23                       | 25                          | 27                  |
| <i>Bos taurus</i>                |                     |                          |                         |                     | 100               | 66                 | 69                    | 36                             | 30                            | 13                           | 19                              | 21                              | 23                               | 34                     | 19                          | 27                       | 23                          | 25                  |
| <i>Danio rerio</i>               |                     |                          |                         |                     |                   | 100                | 82                    | 48                             | 33                            | 18                           | 23                              | 19                              | 26                               | 30                     | 25                          | 22                       | 25                          | 23                  |
| <i>Xenopus laevis</i>            |                     |                          |                         |                     |                   |                    | 100                   | 47                             | 34                            | 20                           | 21                              | 18                              | 27                               | 31                     | 26                          | 23                       | 26                          | 26                  |
| <i>Drosophila melanogaster</i>   |                     |                          |                         |                     |                   |                    |                       | 100                            | 32                            | 20                           | 24                              | 20                              | 22                               | 23                     | 20                          | 23                       | 24                          | 24                  |
| <i>Caenorhabditis elegans</i>    |                     |                          |                         |                     |                   |                    |                       |                                | 100                           | 19                           | 23                              | 19                              | 20                               | 22                     | 20                          | 20                       | 21                          | 21                  |
| <i>Plasmodium falciparum</i>     |                     |                          |                         |                     |                   |                    |                       |                                |                               | 100                          | 21                              | 15                              | 17                               | 12                     | 15                          | 19                       | 20                          | 20                  |
| <i>Dictyostelium discoideum</i>  |                     |                          |                         |                     |                   |                    |                       |                                |                               |                              | 100                             | 18                              | 25                               | 18                     | 17                          | 15                       | 22                          | 23                  |
| <i>Saccharomyces cerevisiae</i>  |                     |                          |                         |                     |                   |                    |                       |                                |                               |                              |                                 | 100                             | 33                               | 26                     | 24                          | 26                       | 19                          | 17                  |
| <i>Schizosaccharomyces pombe</i> |                     |                          |                         |                     |                   |                    |                       |                                |                               |                              |                                 |                                 | 100                              | 34                     | 31                          | 30                       | 22                          | 24                  |
| <i>Ustilago maydis</i>           |                     |                          |                         |                     |                   |                    |                       |                                |                               |                              |                                 |                                 |                                  | 100                    | 23                          | 23                       | 21                          | 23                  |
| <i>Aspergillus nidulans</i>      |                     |                          |                         |                     |                   |                    |                       |                                |                               |                              |                                 |                                 |                                  |                        | 100                         | 37                       | 24                          | 24                  |
| <i>Neurospora crassa</i>         |                     |                          |                         |                     |                   |                    |                       |                                |                               |                              |                                 |                                 |                                  |                        |                             | 100                      | 26                          | 26                  |
| <i>Arabidopsis thaliana</i>      |                     |                          |                         |                     |                   |                    |                       |                                |                               |                              |                                 |                                 |                                  |                        |                             |                          | 100                         | 63                  |
| <i>Oryza sativa</i>              |                     |                          |                         |                     |                   |                    |                       |                                |                               |                              |                                 |                                 |                                  |                        |                             |                          |                             | 100                 |

**C**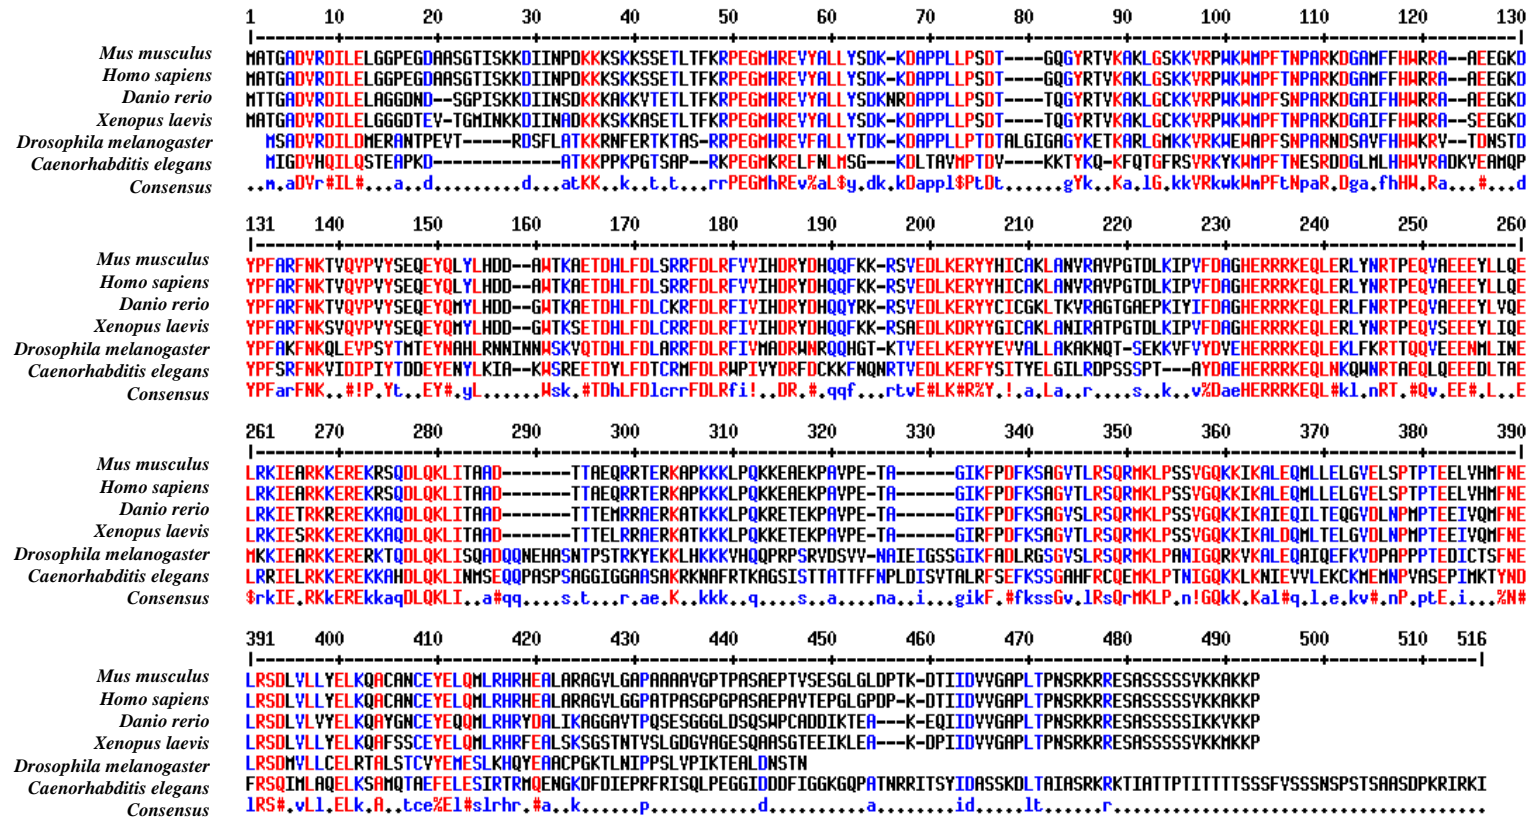

Figure S2

**A**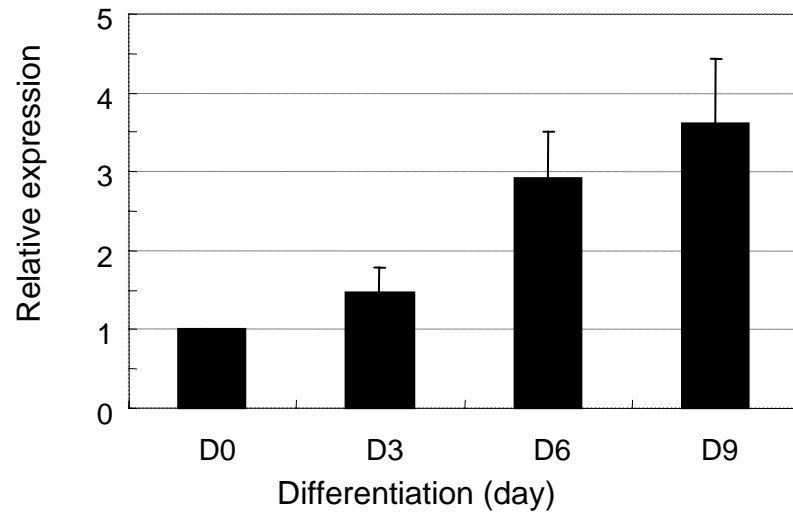**B**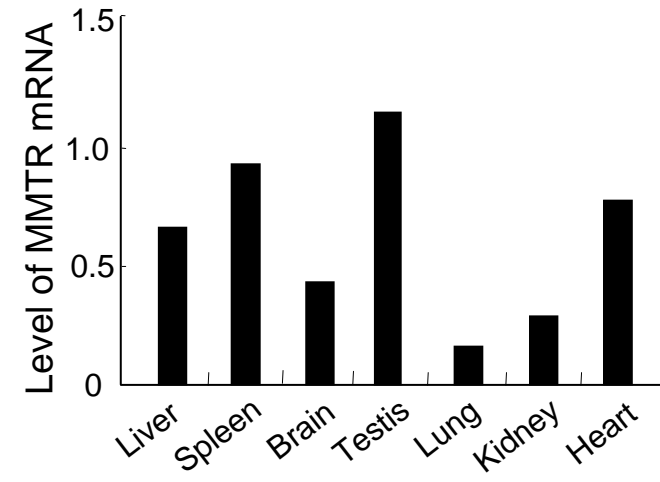**C**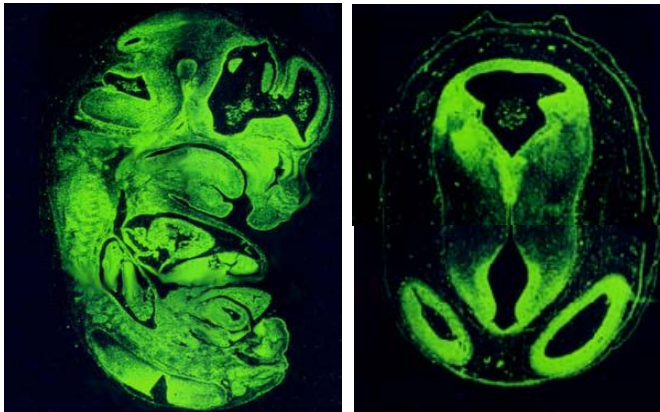**D**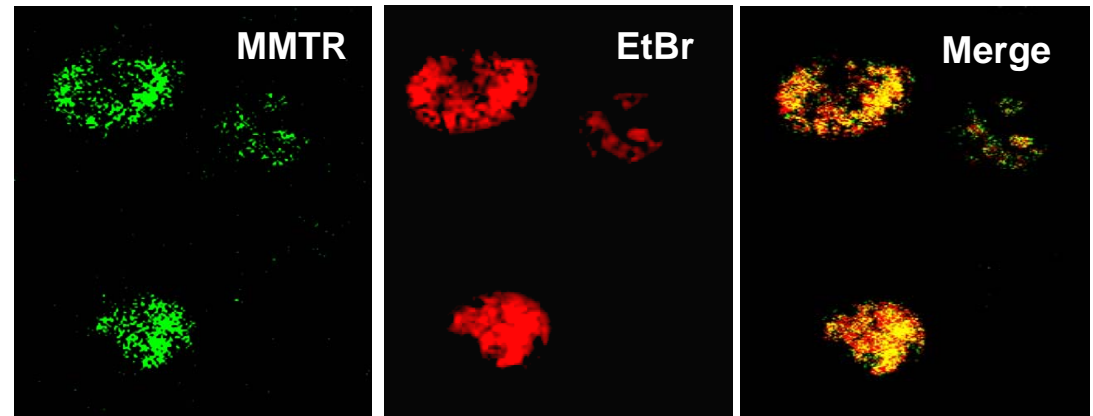

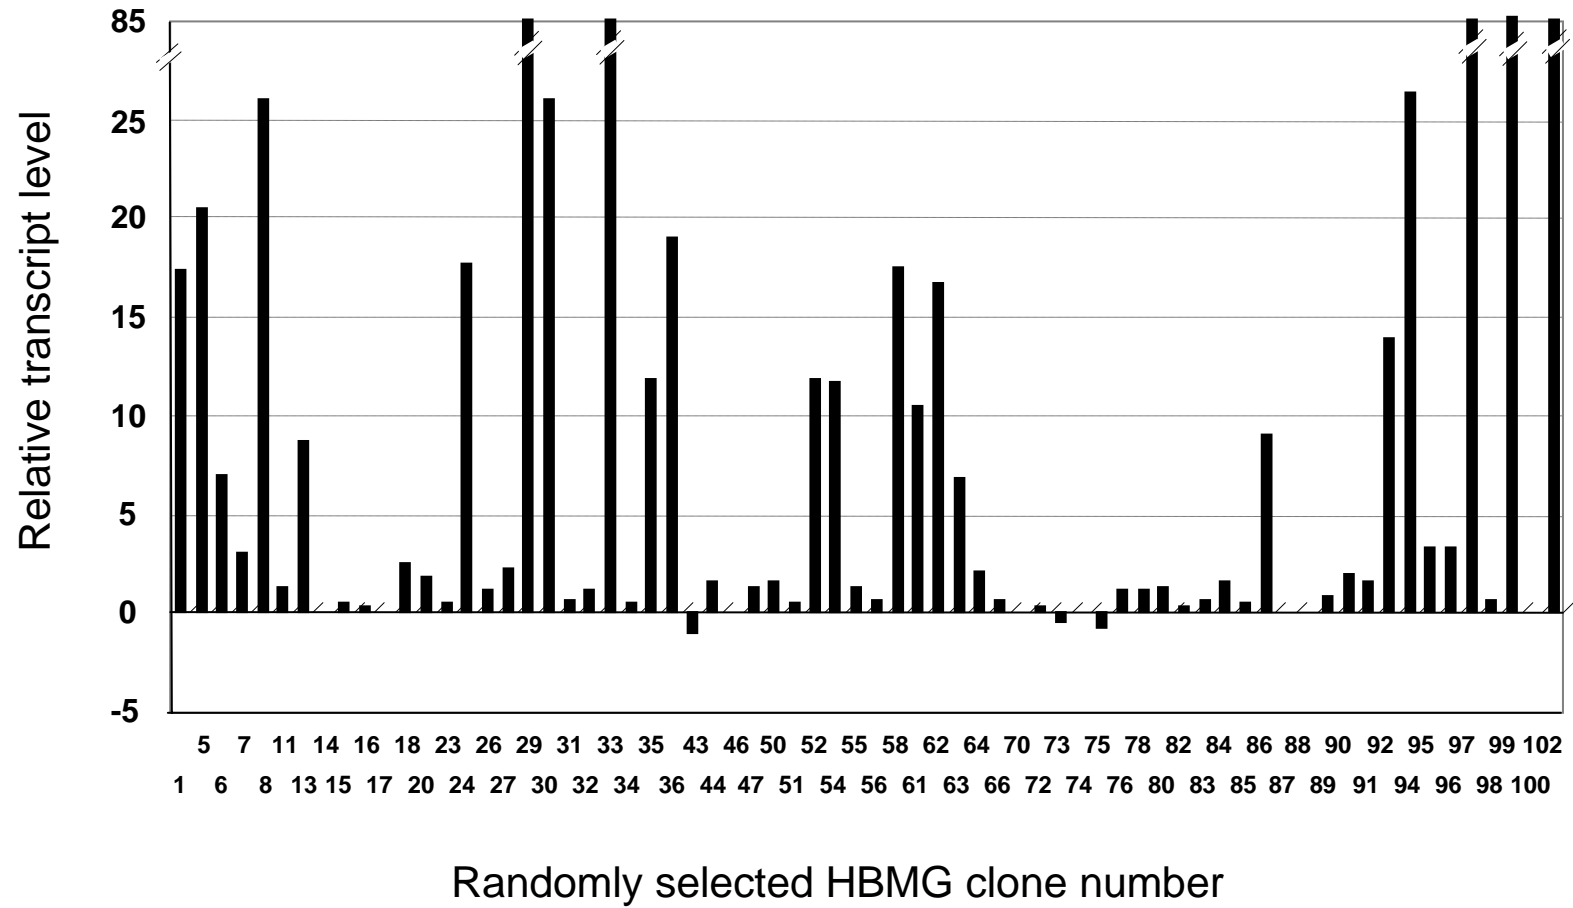

Figure S4
